# Supplementary material for: Systemic Barriers and Equitable Interventions to Improve Vegetable and Fruit Intake in Children: Interviews with National Food System Actors
Source: Int J Environ Res Public Health. 2019 Apr 17;16(8):1387. doi: 10.3390/ijerph16081387 (PMC6518010; doi:10.3390/ijerph16081387)
Supplement: Supplementary file 1 [file ijerph-16-01387-s001.pdf]

101 revised

Feel better

Less obesity

more nutrients consumed

Function at higher capacity

Better at study + work

Increased consumption of fruit + veg

Healthier children

Healthier adults

Low fruit + veg intake

Increased Risk of disease + poor health

Difficulty working

Low income Poverty

Need for Food programmes in schools

Lunch programme in low decile schools

Breakfast

Fruit in schools

Food banks don't give out a lot of fresh produce

Buy high energy/low prep food instead of fresh fruit/veg

Only buy a little veggie

High price of fruit + veg

GST off fruit and veg

Grower support needed

Not enough money to buy food

No choice

Low/Small food budget (after paying rent/bills)

Food preparation time consuming

Vegetable gardens are not practical

Insecure housing

Carer responsibilities

Not enough time

Children growing up in low income families/poverty

Low/medium Tax Credit (WFF)

Low income work

Have to go to many WINZ appointments

Not enough \$ from government for priority interventions

Low Benefits/Welfare Safety Net

Learn cooking skills at home from parents

Only some families teaching their children

No home economics anymore in schools

Nutrition education needed (but won't fix problem)

102 revised

Figure 51: Cognitive map from interview 101.

S2

Less health budget

Stability for growers

+ Sales of vegetables → for health promotion

Eating seasonally

Time to prepare food

Increased knowledge

Parents' Cooking skills

Recip cards + video recipe instructions

Generational issues of low food knowledge + skills

Access (veg fruit not available at local store)

Low income → limited food budget

Limited cooking equipment (pots + pans)

Weather unpredictable

Regional Variations

Expensive land

Urban sprawl

Increasing population

More multisite large grower operations

Small farmers give up

Increased regulation and paperwork for growers

Supermarket + retail mark-up / profit

Price / + fluctuations

Lower yield (amount harvested)

Risk of being overwatered

Increased Confidence

Children's Cooking skills improved at school

New Unit Plan

Teachers on board

Research slowed need for professional development of teachers + new lesson plans

V intake

Figure S2. Cognitive map from Interview 102.

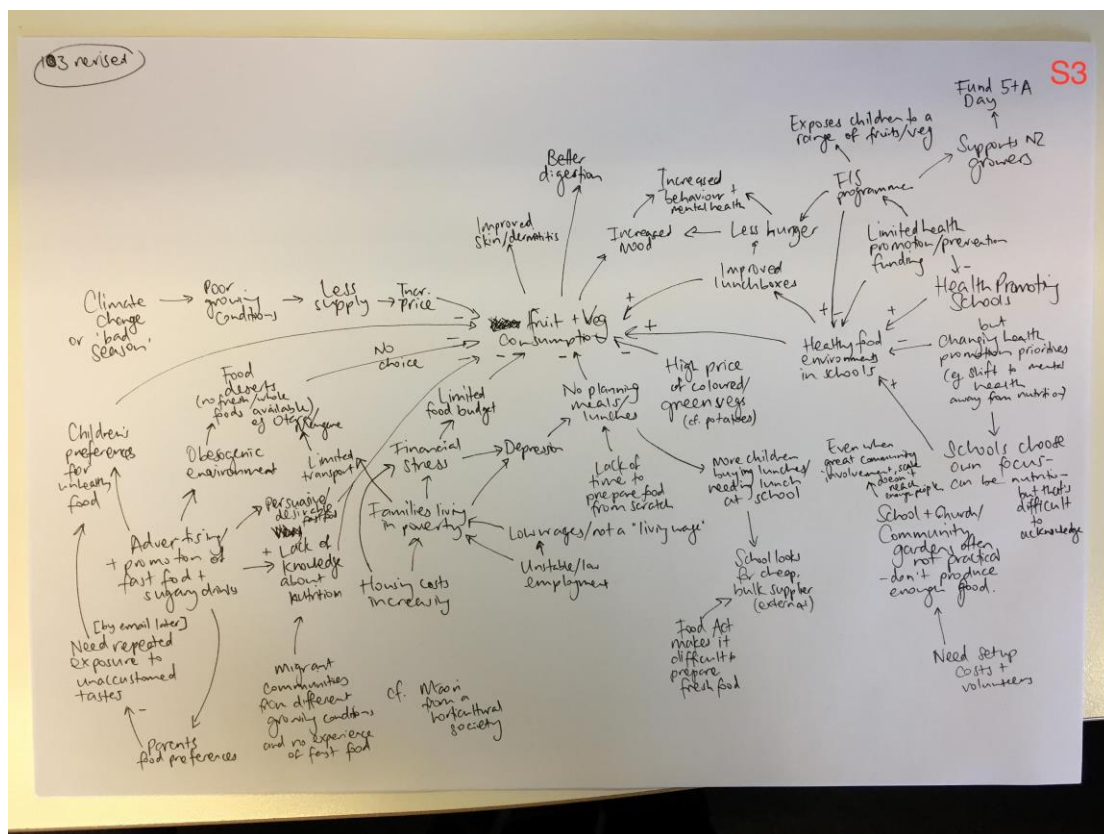

Figure S3. Cognitive map from Interview 103.

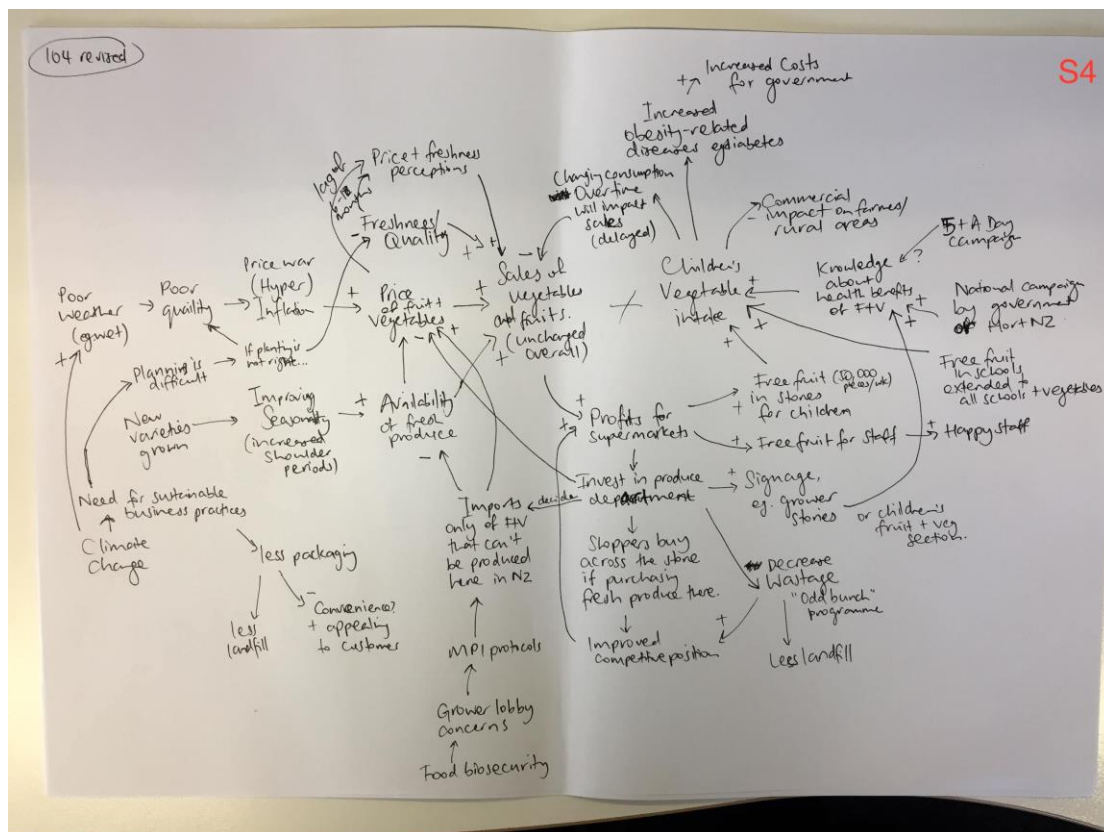

Figure S4: Cognitive map from Interview 104.

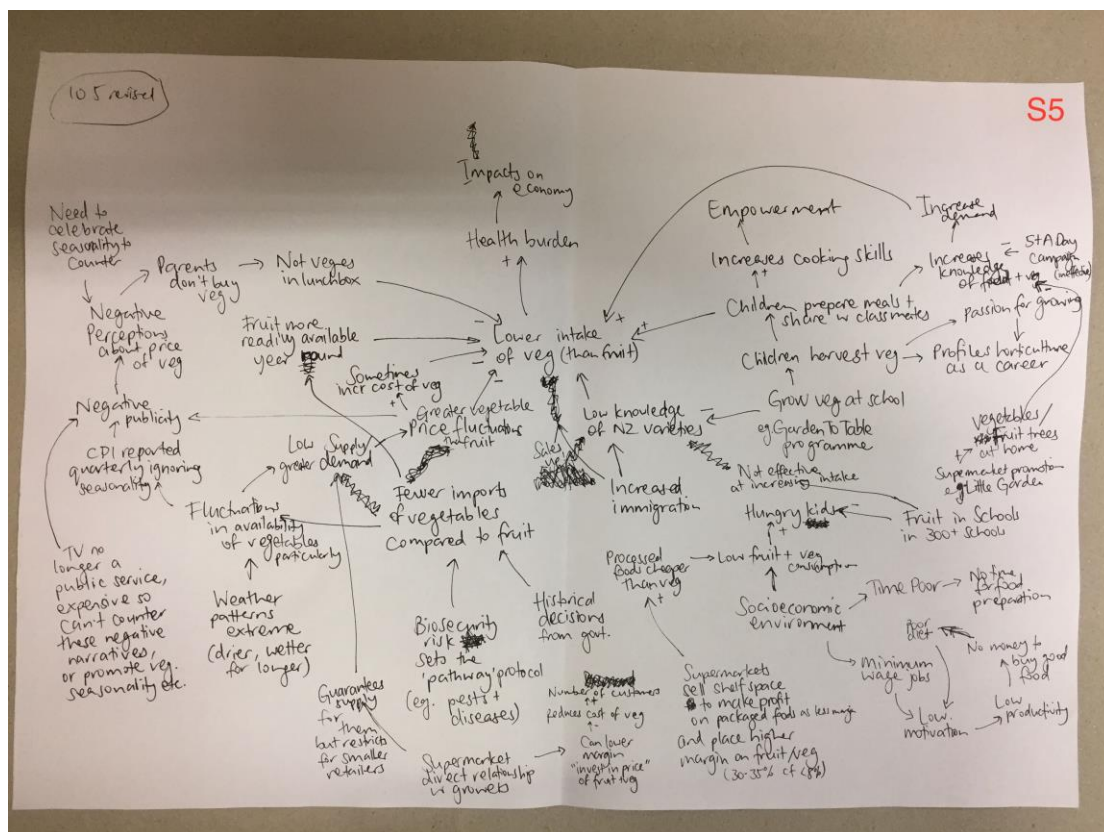

Figure S5. Cognitive map from Interview 105.

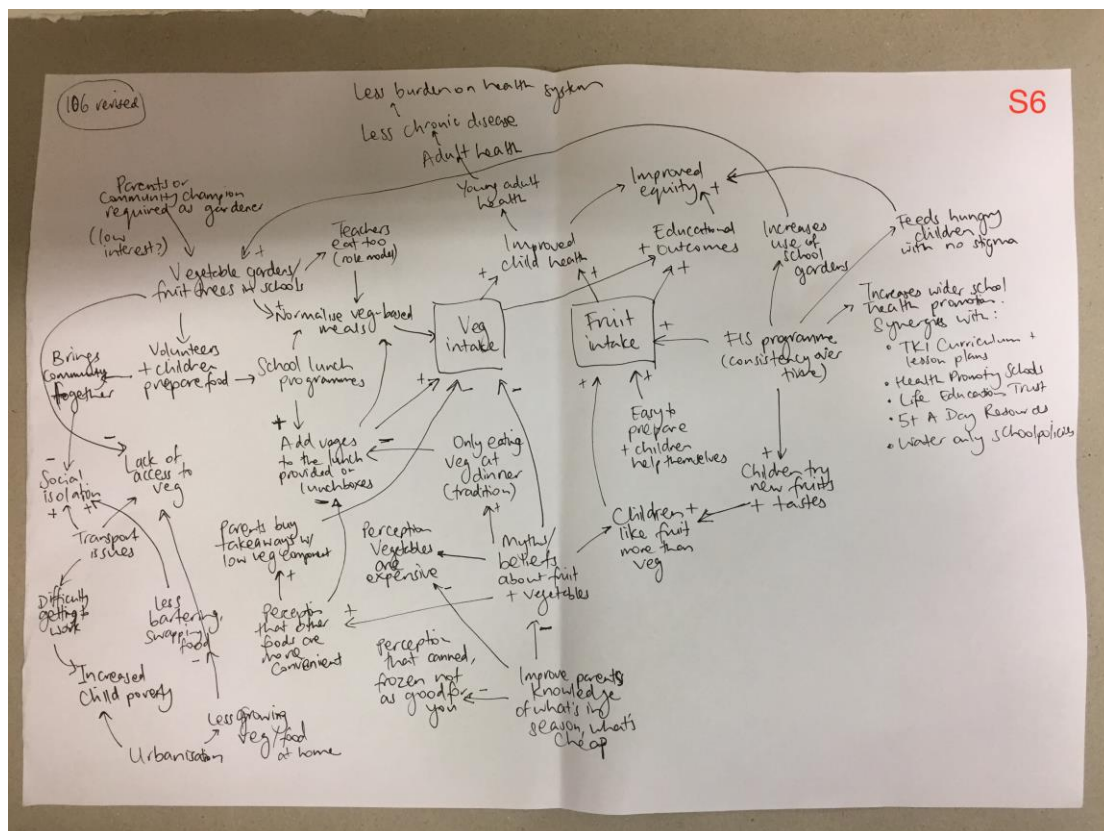

Figure S6. Cognitive map from Interview 106.

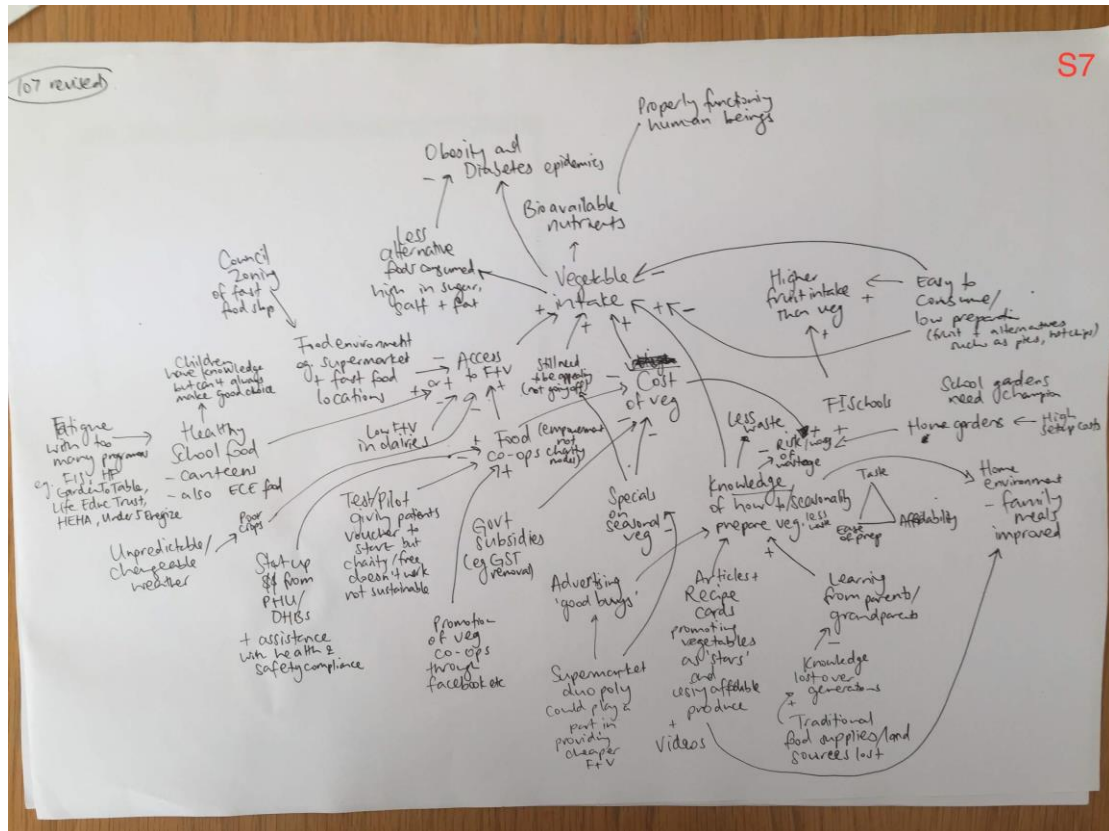

Figure S7. Cognitive map from Interview 107.

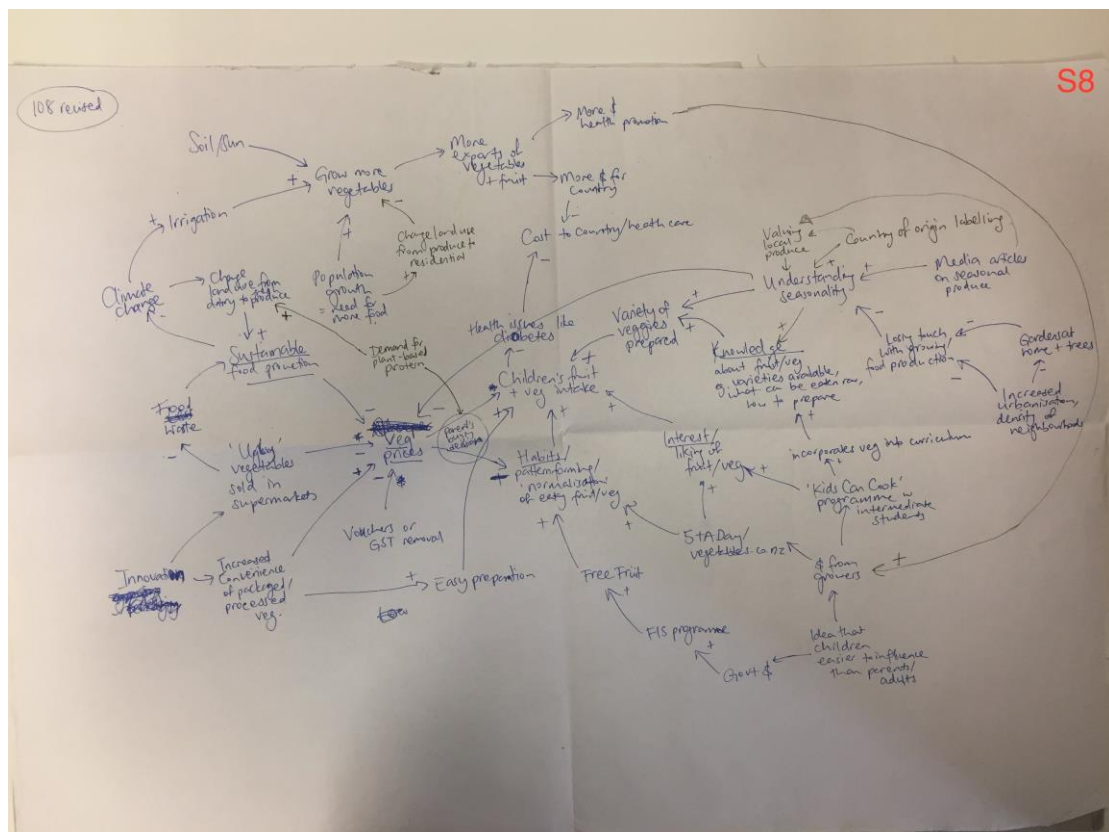

Figure S8. Cognitive map from Interview 108.

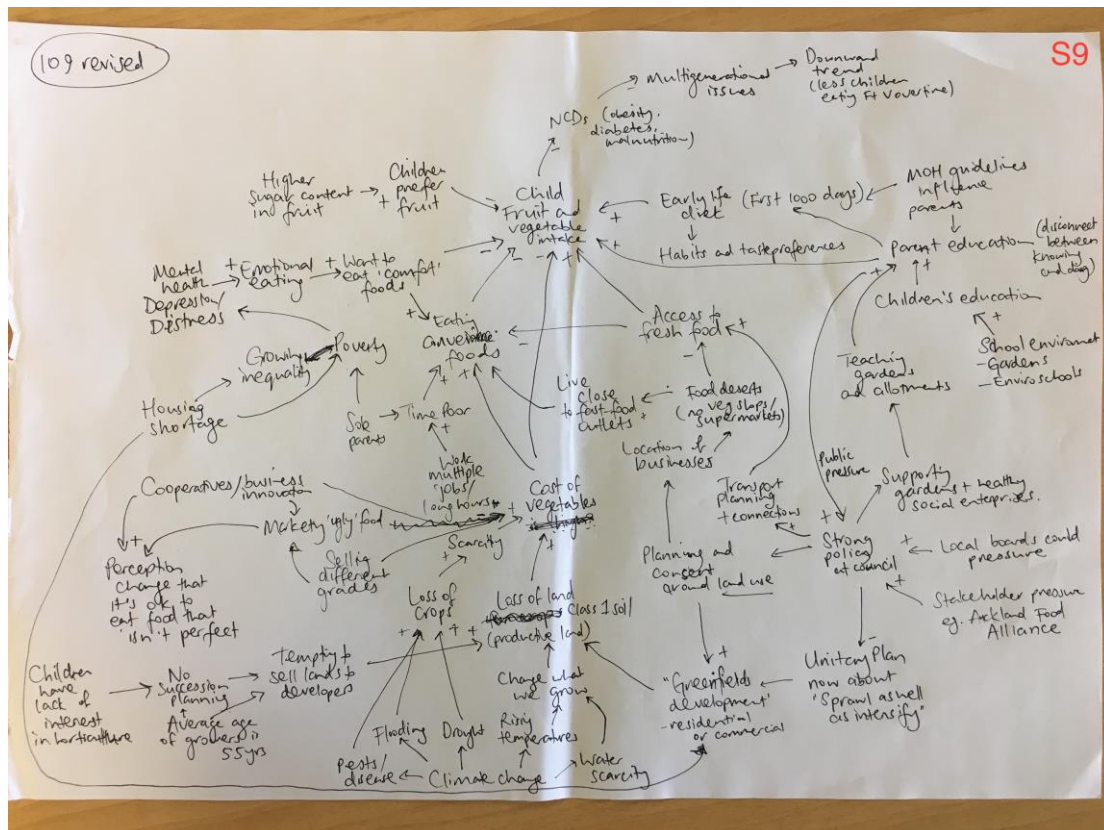

Figure S9. Cognitive map from Interview 109.

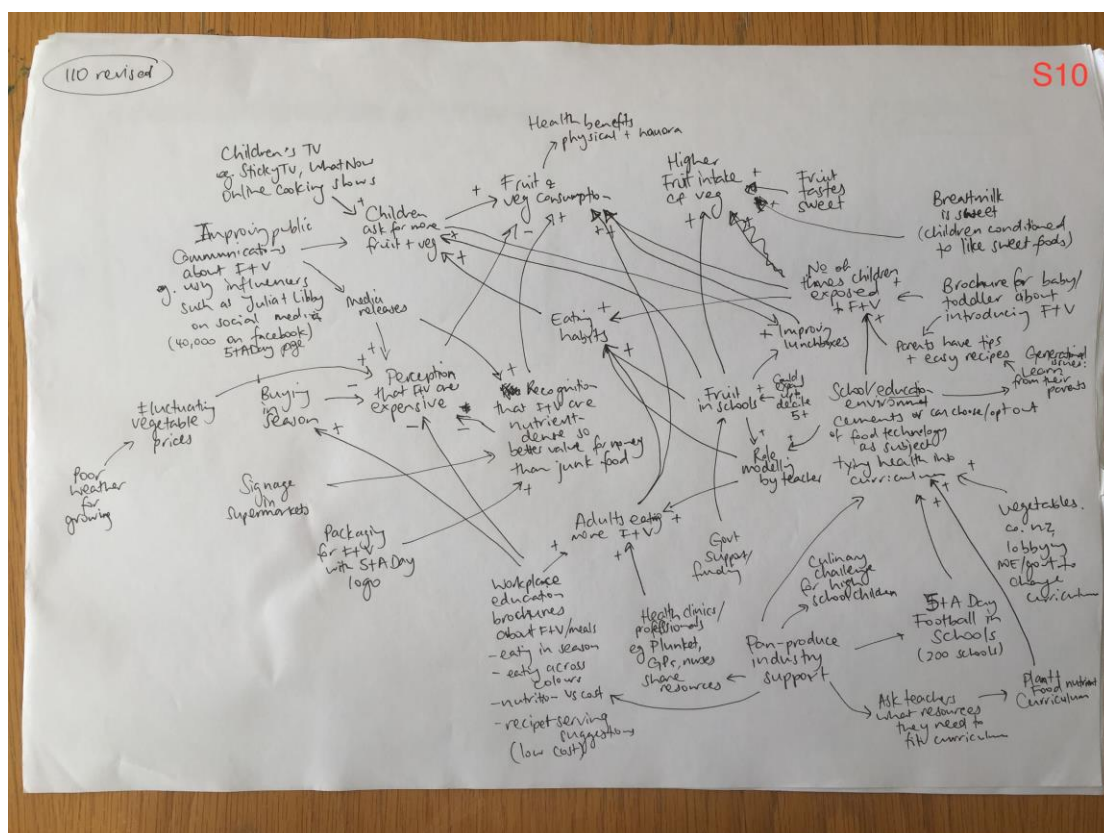

Figure S10: Cognitive map from Interview 110.

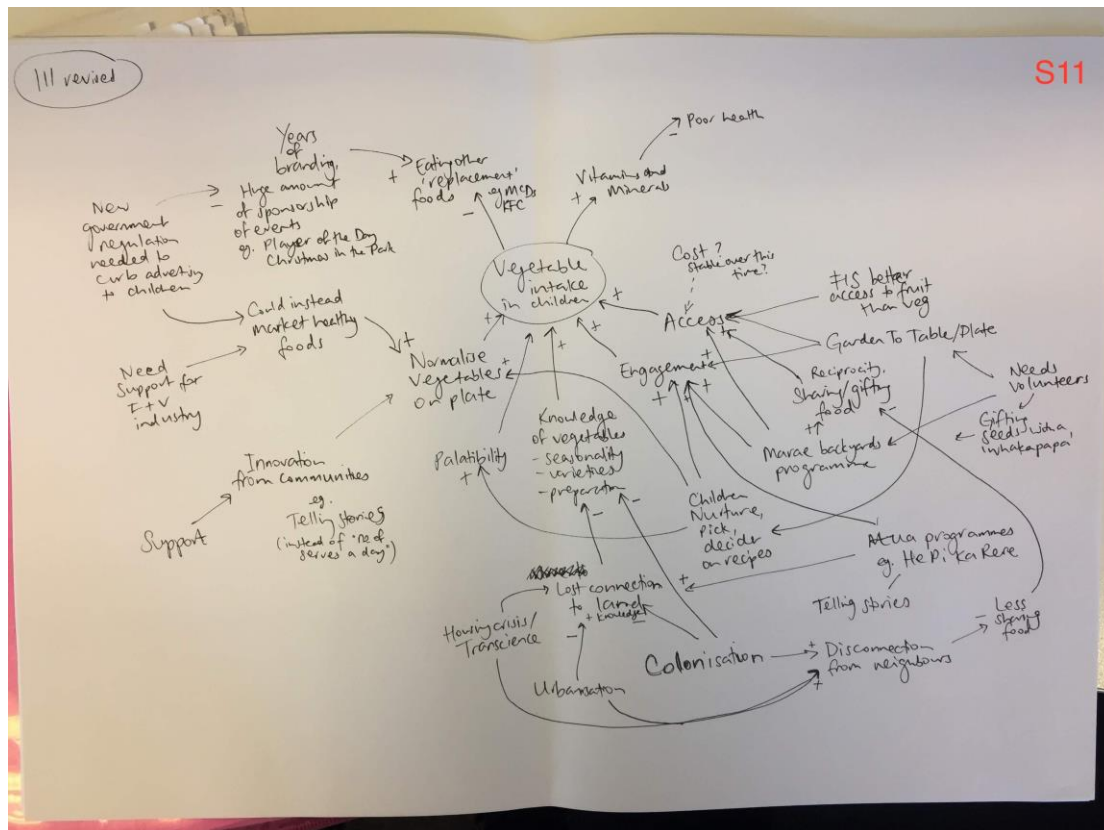

Figure S11. Cognitive map from Interview 111.

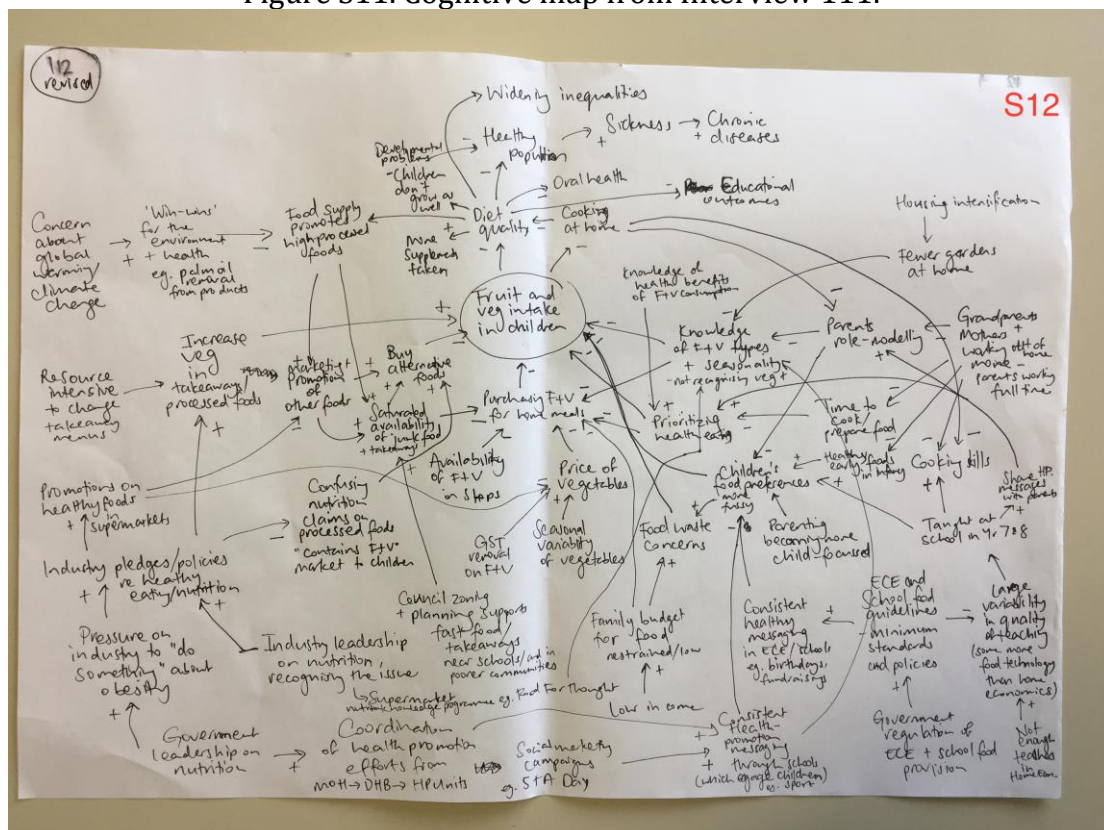

Figure S12: Cognitive map from Interview 112.

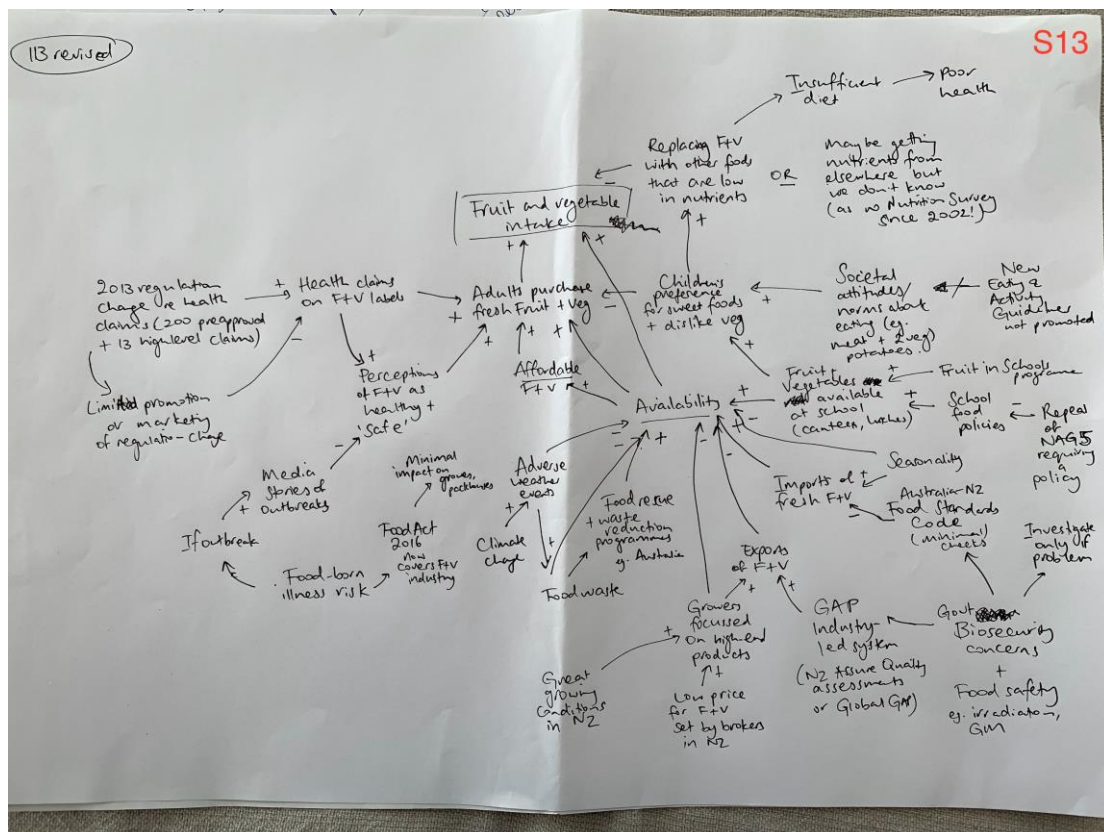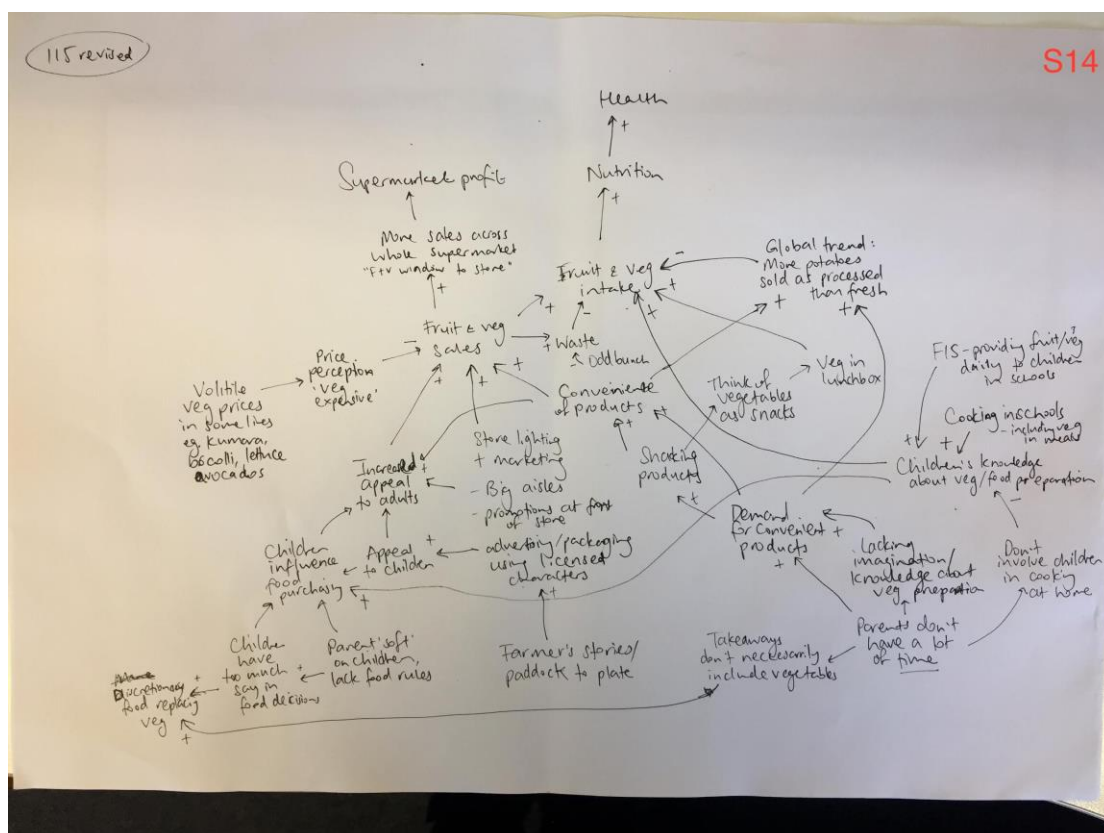

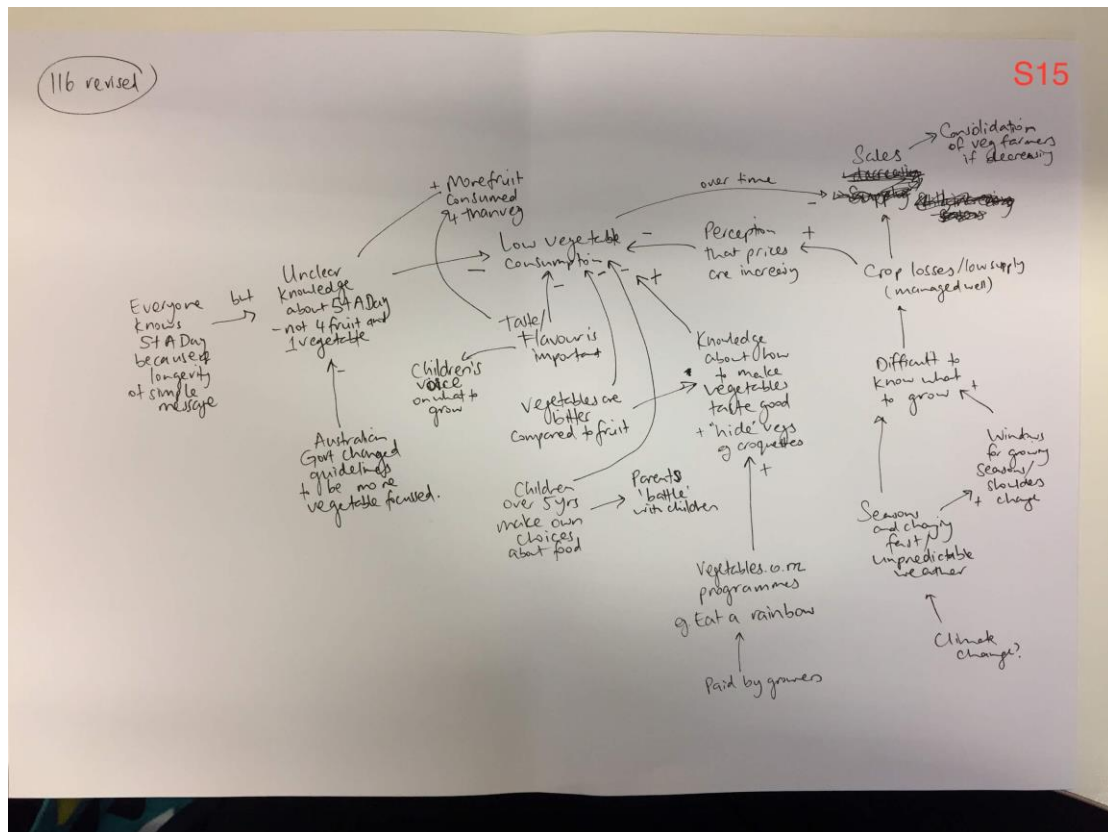

Figure S15. Cognitive map from Interview 116.

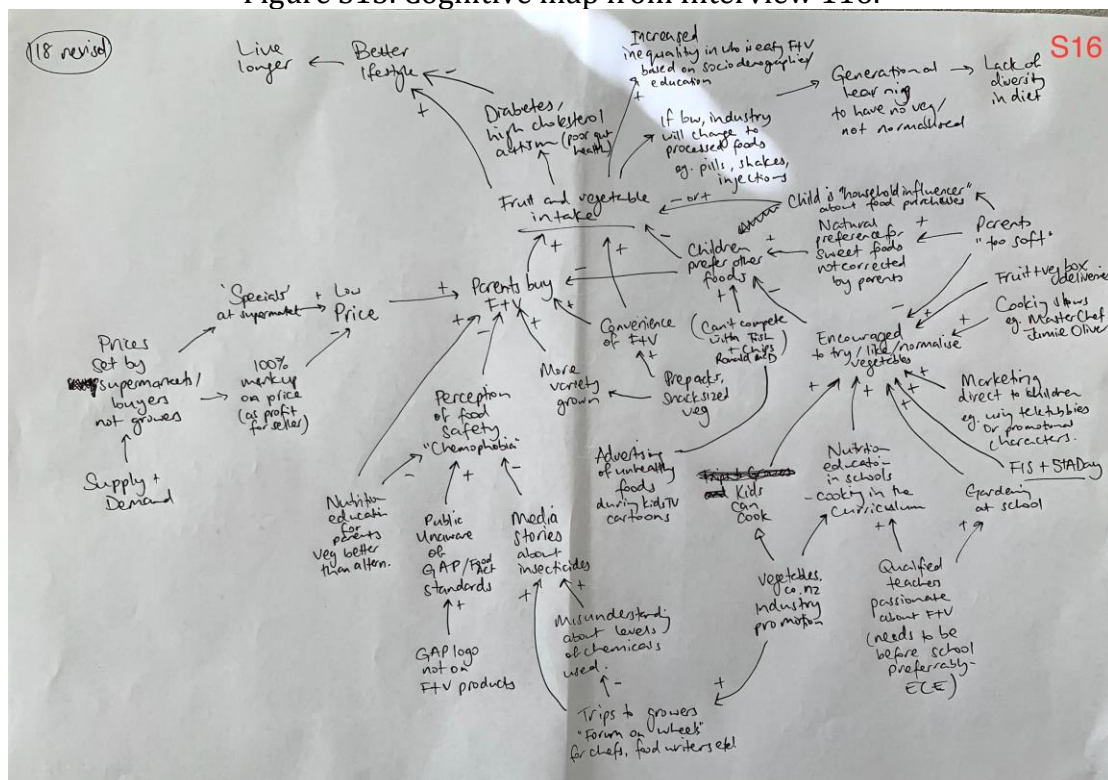

Figure S16. Cognitive map from Interview 118.
